# Supplementary material for: Gua Sha, a press-stroke treatment of the skin, boosts the immune response to intradermal vaccination
Source: PubMed Central journal article supplement (PMC5028785; doi:10.7717/peerj.2451), 2016-09-14

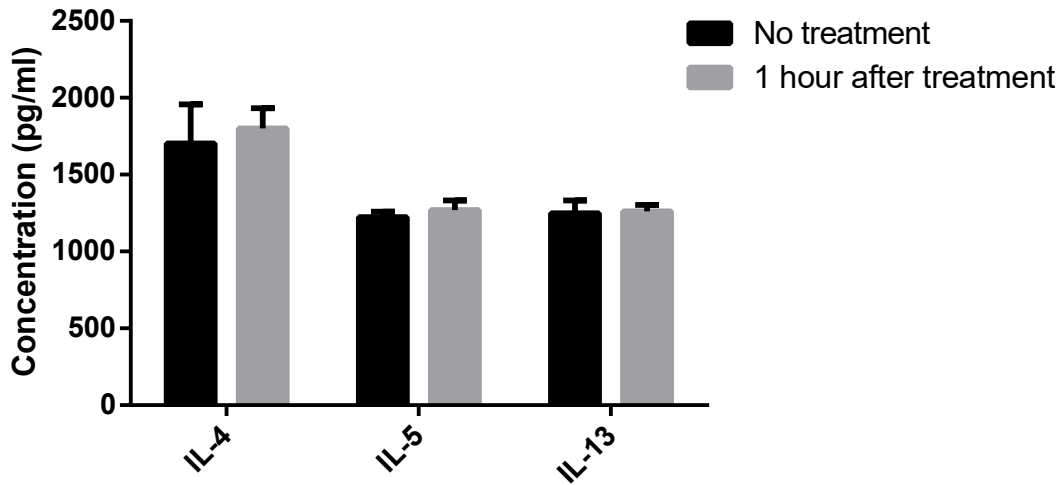

Supplement: peerj-04-2451-s001.pdf [file peerj-04-2451-s001.pdf]
